1 Experimental infection characteristics of *Bordetella pertussis* via aerosol  
2 challenge on rhesus macaques

3

4 Dachao Mou<sup>1,2\*</sup>, Peng Luo<sup>3\*</sup>, Jiangli Liang<sup>1,2</sup>, Qiuyan Ji<sup>1,2</sup>, Lichan Wang<sup>3</sup>, Na Gao<sup>1,2</sup>, Qin Gu<sup>1,2</sup>,  
5 Chen Wei<sup>3</sup>, Yan Ma<sup>1,2</sup>, Jingyan Li<sup>1</sup>, Shuyuan Liu<sup>1</sup>, Li Shi<sup>1\*\*</sup>, Mingbo Sun<sup>1,2\*\*</sup>

6 **1** Institute of Medical Biology, Chinese Academy of Medical Science & Peking Union Medical College, Kunming,  
7 Yunnan, China. **2** Yunnan Key Laboratory of Vaccine Research and Development on Severe Infections Diseases,  
8 Kunming, Yunnan, China, **3** Department of Diphtheria, Tetanus and Pertussis vaccine and Toxins, National  
9 Institute for Food and Drug Control, Beijing, China

10

11 \* Contributed equally as first authors

12

13 Correspondence to:

14 Dr. Mingbo Sun

15 Institute of Medical Biology

16 Chinese Academy of Medical Sciences & Peking Union Medical College

17 Yunnan Key Laboratory of Vaccine Research and Development on Severe Infections Diseases

18 Kunming 650118, China.

19 Tel: +8687168334483

20 Fax: +8687168334483

21 E-mail: smb@imbcams.com.cn

22

23 And

24

25 Dr. Li Shi

26 Institute of Medical Biology

27 Chinese Academy of Medical Sciences & Peking Union Medical College

28 Kunming 650118, China

29 Tel: +8687168335652

30 Fax: +8687168335652

31 E-mail: shili.imb@gmail.com

32

33 **Abstract**

34 The effect of aerosol challenge of rhesus macaques with *Bordetella pertussis* and the feasibility  
35 of using rhesus monkeys as an animal model for pertussis infection were evaluated in this study.

36 Four 1-year old rhesus macaques were aerosol challenged with *B. pertussis* at the concentration of  
37  $10^5$  CFU/mL for 30 min (group 1) or 60 min (group 2). Rectal temperature was found slightly  
38 increased at days 3 and 5 and returned to baseline levels at day 21 after challenge. White blood  
39 cell counts peaked at day 7, with a 4.7~6.1-fold increase, and returned to baseline levels at day  
40 45. Bacteria colonization of nasopharyngeal swabs was observed, and the number of colonies

41 was gradually increased and peaked at day 14, reaching  $5.4\text{--}8.1 \times 10^6/\text{mL}$ . The seroconversion  
42 rate of anti-pertussis toxin (PT), pertactin (PRN), and filamentous hemagglutinin(FHA) antibodies  
43 was 100%, with an increase in geometric mean titers after challenge. Analysis of cytokines  
44 revealed that the levels of cytokines including IL-2, IL-6, IL-8, IL-10, IL-17A, IL-13, IL-12, and  
45 IL-18 were significantly increased at days 5 to 14 in group 2. These results demonstrate that the  
46 characteristic of pertussis infection in infant rhesus macaque was similar as in human beings,  
47 which provide a clue to using infant rhesus macaque as a candidate model for pertussis infection  
48 in the future studies

49

50 **Keywords** Pertussis; Rhesus macaque animal model; Aerosol challenge

51

## 52 **Introduction**

53 Pertussis is a contagious respiratory disease caused by the bacterium *Bordetella pertussis*.  
54 The disease is characterized by sudden spasmodic cough accompanied by inspiratory whoop or  
55 posttussive emesis lasting several months and may cause death in infants without treatment[1].  
56 Guillaume De Baillou first described a pertussis outbreak in Paris in the summer of 1578[2]. The  
57 epidemic involved mainly infants, and the mortality rate was high. The diagnosis of pertussis was  
58 based primarily on bacterial culture[3, 4], antigen detection by polymerase chain reaction[5], and  
59 serological antibody detection[6]. Pertussis remains a major threat to the health of children  
60 worldwide and causes high economic burden at the state and local level[7, 8].

61 Pertussis is preventable and, in the 1930s, Medson [9] developed whole-cell pertussis (wP)  
62 vaccine. In 1981, Japanese researchers developed acellular pertussis (aP) vaccine containing  
63 pertussis toxin (PT) and filamentous hemagglutinin (FHA) or a small amount of agglutinin[10,  
64 11]. The vaccine significantly reduced the incidence of pertussis. However, in recent years, the  
65 effectiveness of pertussis vaccine has been contested. In the United States, although the pertussis  
66 vaccination rate is >95%, the incidence of pertussis in the past 30 years is increasing[12],  
67 especially in 2004, 2010, and 2012[13, 14]. This increase may be related to the decrease in the  
68 immune protective efficiency induced by vaccination[15], transmission of asymptomatic latent  
69 infection[16], cross-infection via healthcare personnel and travelers[17, 18], and pathogen  
70 adaptation in immune populations after large-scale vaccination [19].

71 The immune mechanisms underlying pertussis infection and the efficacy of new vaccines and  
72 combined vaccines can be studied by establishing suitable animal models that replicate the full  
73 spectrum of the disease. Most infection studies are carried out in mouse, rat, rabbit, and piglet  
74 models of pertussis[20, 21]. However, these models cannot reproduce the full clinical spectrum  
75 achieved in human models[22, 23]. With respect to studies using non-human primate models, a  
76 successful baboon model was established by Warfel et al[24]. However, the use of baboons as an  
77 animal model of pertussis is limited because of the limited availability of animals, high housing  
78 costs, and lack of suitable reagents. Compared with the baboon model, the advantages of using  
79 rhesus macaque models include high availability of animals, low housing costs, and availability of  
80 suitable reagents, and therefore this animal model is considered ideal[25]. Since 1929, three  
81 studies have evaluated the infection of rhesus monkeys with *B. pertussis*. However, these studies  
82 could not replicate the clinical disease in humans[26-28].

83 In the present study, rhesus macaques aged 12 to 14 months were challenged with *B.*  
84 *pertussis* via aerosol injection; indices of infection, including leukocyte count and colonization of

85 the nasopharynx, were determined; and the humoral immune response and cytokines were  
86 analyzed to assess the possibility of using rhesus monkeys as an animal model for pertussis  
87 infection. Infection efficiency was evaluated after challenge for different periods.

88

## 89 **1 Materials and methods**

90 **1.1 *B. pertussis* medium preparation** A total of 44 g of Bordet-Gengou agar medium (B-G  
91 medium: peptone, 20.0 g/L; potato extract, 4.5 g/L; NaCl, 5.5 g/L; agar, 14.0 g/L, pH 6.7 ± 0.2  
92 from Haibo Biology) and 10 mL of glycerol were added to 700 mL of distilled water. The medium  
93 was mixed, dissolved by heating, and autoclaved at 121 °C for 15 min. The solution was cooled to  
94 45–50 °C, and 300 mL of sterile defibrinated sheep blood (Lanzhou Minhai Company) was added.  
95 The culture medium was transferred to a sterile Petri dish or test tubes. *B. pertussis* (strain  
96 No.18323/CMCC58030; batch No. 2012003, obtained from the National Institutes for Food and  
97 Drug Control and cryopreserved by IMBCAMS) was resuspended in a small volume of sterile  
98 saline and transferred to a flask containing culture medium. The medium was incubated in an  
99 incubator at 37 °C and transferred to two flasks containing culture medium. After incubation at  
100 37 °C for 48 h, the medium was transferred to four to six flasks and incubated at 37 °C for 24 h.  
101 The bacterial sediment was resuspended in isotonic saline, diluted to a concentration of 10<sup>11</sup>  
102 CFU/mL using a turbidimetric method, and used within 2 h after preparation.

103

104 **1.2 Animal use and welfare** Four healthy rhesus macaques, two males and two females, aged 12  
105 to 14 months, were obtained from the Institute of Medical Biology, Chinese Academy of Medical  
106 Sciences (IMBCAMS) (Animal License No. SCXK (Dian) K2015-0004) The rhesus macaques  
107 were assigned to two groups randomly, with two animals in each group (one male and one female).  
108 Animal study was conducted in compliance with the Animal Welfare Act, Declaration of Helsinki  
109 (2013 revision) and other regulations relating to animal experiments. The rhesus macaques were  
110 confirmed to be healthy, acclimated to the animal house, and identified by hanging tag on the neck.  
111 And these animals were fed with food and fruits strictly complying with requirements of animal  
112 welfare and music was played during 11:00 ~13:00 every day.

113

114 **1.3 Challenge of rhesus macaques** The aerosol apparatus used for this study was designed by our  
115 lab and produced by Lanfang Honlan Equipment Co. The apparatus was composed of a  
116 rectangular Plexiglas chamber with a removable lid (40 cm × 60 cm × 40 cm) , a pump and a  
117 medical nebulizer (average atomization rate: ≥ 0.15 mL/min, working pressure: 60–150 KPa,  
118 normal working condition: 10–40 °C). The pump was connected to the inlet side of the nebulizer  
119 to deliver *B. pertussis* suspension for atomization. The outlet side of the nebulizer was connected  
120 to two inlet port of the challenge chamber to deliver atomized *B. pertussis* to the interior of the  
121 chamber. Outlet tube with an air filter was connected to the challenge chamber to remove air. An  
122 air sampling port was embedded in the middle of the challenge chamber to monitor actual  
123 concentration of aerosol *B. pertussis* inside the chamber(Fig 1).

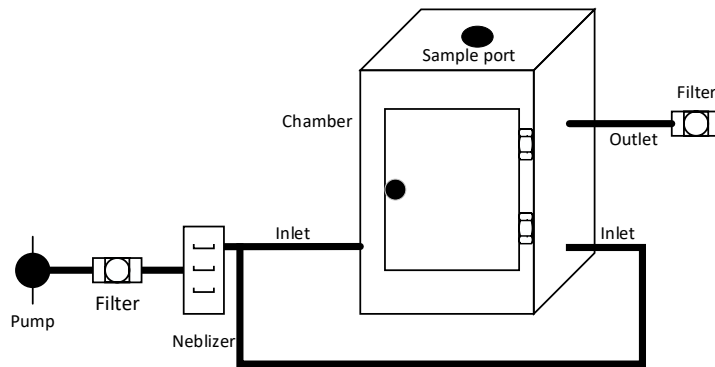

124  
125 **Fig. 1 Simplified layout of aerosol apparatus**  
126

127 *B. pertussis* strain 18323 at a concentration of  $10^{11}$  CFU/mL with 8mL was delivered to the  
128 nebulizer for aerosolisation. After aerosol generation, 10 mL of air was sucked out from the  
129 sampling port every 5 min using syringes and injected into 10 mL saline. The solution was  
130 transferred to B-G medium and the number of colonies was determined to ensure actual challenge  
131 concentration.

132 The rhesus macaques of one group were placed into the challenge box for challenging. In group 1,  
133 the macaques were numbered as 1 and 2, and were challenged with  $10^5$  CFU/mL for 30 min. In  
134 group 2, the macaques were numbered as 3 and 4 and were challenged with  $10^5$  CFU/mL for 60  
135 min. After challenging, the two groups were housed separately.

136  
137 **1.4 Monitoring the rectal temperature of rhesus macaques** The rectal temperature in the two  
138 groups was measured before aerosol challenge and at days 3, 5, 7, 10, 14, 21, 31, and 45 after  
139 challenge.

140  
141 **1.5 White blood cell (WBC) count** A volume of 150  $\mu$ L of EDTA-anticoagulated venous blood  
142 was drawn before aerosol challenge and at days 3, 5, 7, 10, 14, 21, 31, and 45 after challenge. The  
143 number of WBCs was determined by blood cell counting.

144  
145 **1.6 Culture of nasopharyngeal bacteria** At each sampling point, nasopharyngeal bacteria were  
146 collected using nasopharyngeal and nasal swabs. Bacteria were suspended in 1 mL of saline and  
147 cultured in B-G medium containing 30% sterile defibrinated sheep blood diluted 100, 400, 800,  
148 and 1600-fold within 2 h. The number of colonies was determined after 5 days. Colonies were  
149 picked from the blood agar, subjected to Gram staining, and their morphology was analyzed by  
150 microscopy. Bacterial DNA was extracted and identified by 16S rRNA sequencing. Sequencing  
151 was performed by Beijing Nuohezhiyuan Technology CO., Ltd. in an Illumina technology  
152 sequencing platform using the paired-end method.

153  
154 **1.7 Determination of antibodies of rhesus macaques after challenge** The venous blood of the  
155 two animal groups was drawn before aerosol challenge and at days 7, 10, 14, 21, 31, 45, and 60  
156 after challenge. Serum was separated and anti-PT, PRN, FHA antibody titers were measured using  
157 ELISA. A 96-well microplate was coated with 3  $\mu$ g/mL of antigens PT, PRN, and FHA and  
158 incubated at 4  $^{\circ}$ C overnight. Diluted serum was added to the microplate and incubated at 37  $^{\circ}$ C for  
159 1 h (All the antigens are come from Department of DTP Vaccine and Toxin, National Institute for

160 Food and Drug Control, China). After that, HRP-labeled sheep anti-monkey IgG was added to the  
161 microplate, and the plate was incubated at 37 °C for 1 h. The substrate 3, 3', 5, 5'  
162 tetramethylbenzidine (TMB) was added to the microplate, the plate was incubated at room  
163 temperature for 30 min, and the reaction was terminated by adding H<sub>2</sub>SO<sub>4</sub>. OD values were  
164 measured at 450 nm. A blank sample was included in each plate and OD values  $\geq$  2.1-fold those of  
165 the blank sample were considered positive. The antibody titers of different types were determined  
166 by calculating the geometric mean titer (GMT), as follows:  $GMT = Lg - 1 [(LgX1 + LgX2$   
167  $+ \dots LgXn)/n]$ . Seroconversion was defined as reaching a positive status (titer was higher than  
168 1:200) after immunization in seronegative subjects (when the baseline titer was below 1:200) or  
169 as a 4-fold increase in titer after immunization when the baseline titer was higher than  
170 seronegative.

171

172 **1.8 Measurement of cytokines after challenge** The venous blood of the two groups was drawn  
173 before aerosol challenge and at days 3, 5, 7, 10, 14, 21, 31, 45 and 60 after challenge. Serum was  
174 separated and 16 different cytokines—GM-CSF, G-CSF, IFN-, IL-2, IL-10, IL-15, IL-17A, IL-13,  
175 IL-1 $\beta$ , IL-4, IL-5, IL-6, TNF $\alpha$ , IL-12 (p40), IL-18, and IL-8—were tested using a Milliplex  
176 cytokine kit (Non-Human Primate Cytokines, Cat. No. PRCYTOMAG-40K, Merck Millipore,  
177 USA).

178

179 **1.9 Statistics** The average values were calculated. Data were analyzed using a *t*-test and software  
180 SPSS version 22.0. P values of  $<0.05$  were considered statistically significant. The fluorescence of  
181 cytokines was measured using a Luminex 200 system and analyzed in Milliplex Analyst software  
182 version 5.1.0.0 using the 5-PL method. Seven measurements were obtained for constructing the  
183 standard curve.

184

## 185 2 Results

186 **2.1 Dose of aerosol used for challenge** Air sample was collected and tested by bacterial culture  
187 during aerosol challenge. Viable bacterial count of air samples 5 min after challenge was increased  
188 significantly, reached 10<sup>5</sup> CFU/mL 10 min after challenge, and this level was maintained until the  
189 end of the study period (Fig. 2).

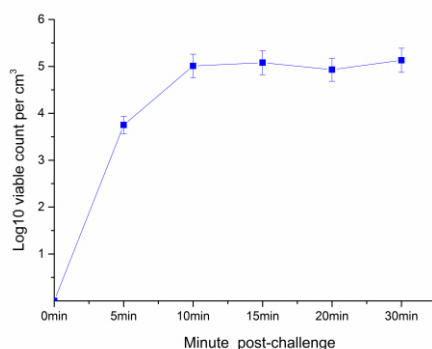

190

191 **Fig. 2 Viable count test for the air in the challenge box during aerosol challenging process**  
192 After aerosol challenge, 10 mL air was sucked out from sampling port using syringes 0, 5, 10, 15,  
193 20, 30 min after challenge, and injected into 10mL saline, 100 $\mu$ L of the liquid was spread on the  
194 B-G medium containing 20% sheep blood and incubated at 37°C for 4 days. The number of

195 colonies was determined.

196

197 **2.2 Aerosol challenge with *B. pertussis* induced changes in vital signs and leukocytosis** Seven  
198 days after challenge with atomized *B. pertussis*, rhesus macaques developed pallor and cough, and  
199 coughing gradually disappeared after 21 days. However, as lack of suitable video recording  
200 system, coughing frequency and duration were not recorded. After challenge for 3 days, the  
201 rectal temperature of both groups was increased, peaked at days 5 and 7, and returned to normal  
202 levels at day 21 after challenge (Fig. 3A).

203 The number of WBCs in the two study groups was significantly increased at day 3 after challenge  
204 ( $P<0.05$ ) and reach to the highest level at day 7 and returned to baseline values at day 45 (Fig. 3B).  
205 In group 2, WBC reached to 49,180 per  $\mu\text{L}$ , corresponding to a 6.1-fold increase relative to  
206 pre-challenge values, and decreased gradually. In group 1, WBC reached to 45,390 per  $\mu\text{L}$ ,  
207 corresponding to a 4.7-fold increase, and decreased to 27310 per  $\mu\text{L}$  at day 10, then increased to  
208 37330 per  $\mu\text{L}$  at day 14, and decreased gradually.

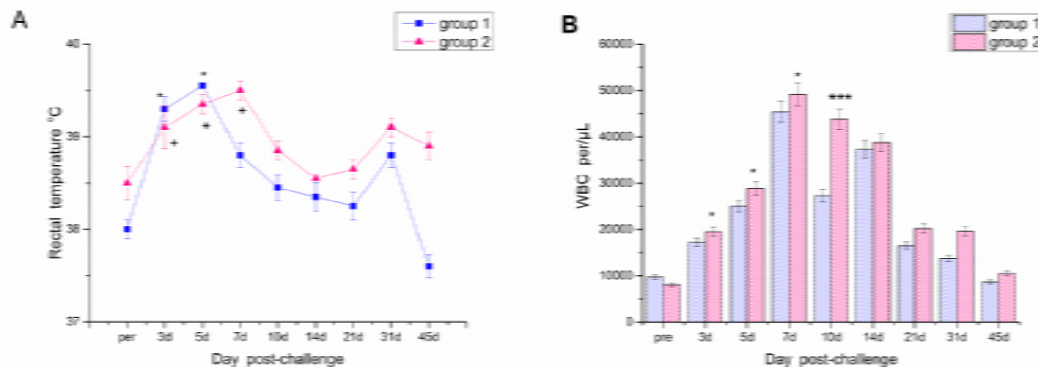

209

210 **Fig. 3 Dynamic profiles of rectal temperature and leukocytosis after challenged with *B.***  
211 ***Pertussis*** Group 1 is challenged for 30 min and group 2 is challenged for 60 min with two rhesus  
212 macaques for each group. (A) Rectal temperature of two groups was measured at each time point  
213 before and after aerosol challenge with electronic thermometer. The data was presented as the  
214 average of the rectal temperature of each group, \* $p<0.05$ , + $p<0.05$ . (B) The number of white  
215 bold cells was determined at each time point before and after aerosol challenging, \* $p<0.05$ , \*\*\* $p$   
216  $<0.001$ .

217

218 **2.3 Aerosol challenge increased nasopharyngeal colonization** At day 3 after challenge, swabs  
219 were collected from the nasal and nasopharyngeal of each test animal for bacterial culture. At days  
220 5, 7, and 10 after challenge, the number of colonies was gradually increased and reached  $5.4 \times 10^6$   
221 and  $8.1 \times 10^6/\text{mL}$  ( $P<0.05$ ) in groups 1 and 2, respectively. After 21 days, the number of colonies  
222 was decreased significantly (Fig. 4).

223 For bacterial identification, colonies collected from nasopharyngeal swabs (P1.5d, P2.5d, P3.5d,  
224 P4.5d) and nasal swabs (N1.5d, N2.5d, N3.5d, N4.5d) at day 5 after challenge and grown on  
225 Bordet-Gengou agar and *B. pertussis* grown on Bordet-Gengou agar were selected and identified  
226 by 16s rRNA sequencing. The results demonstrated that the sequences of colonies identified in  
227 nasopharyngeal swabs at day 5 after challenge were highly homologous to those of *B. pertussis*  
228 (35–95% as *B. pertussis*). In turn, the sequences of bacterial colonies identified in nasal swab  
229 samples at day 5 after challenge presented little homology to those of *B. pertussis* (the degree of



230 homology to *B. pertussis* in one macaque was 25%). The bacteria were identified as Firmicutes  
231 and Actinobacteria, but not Proteobacteria. These results indicated that *B. pertussis* was present  
232 primarily in the nasopharyngeal (Fig. 5).

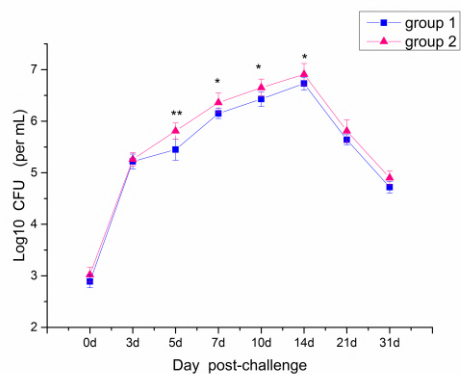

233

234 **Fig. 4 Colonization of nasopharynx of rhesus macaques after challenged with atomized *B.***  
235 ***Pertussis*** At each sampling point, nasopharyngeal bacteria was taken using nasal and nasopharynx  
236 swabs, and suspended in 1mL saline. Similar as method described in Fig 2, 100 $\mu$ L was spread on  
237 cell culture, incubated at 37°C for 4 days and number of colonies was determined, \* $p < 0.05$ , \*\* $p$   
238  $< 0.01$ .

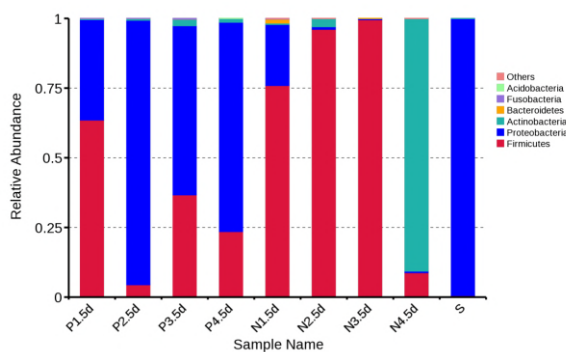

239

240 **Fig. 5 16s subunit identification result of colonies on blood plates** The suspected *B. Pertussis*  
241 colonies on the blood agar were picked and suspended in PBS. DNA of bacteria was extracted and  
242 identified using 16s subunit sequencing. P1-4 represented as bacteria recovered from  
243 **nasopharynx** swabs of No. 1 – 4 rhesus macaques, N1-4 represented as bacteria recovered from  
244 nasal swabs of No. 1 – 4 rhesus macaques and S serves as positive control of *B. Pertussis*.

245

246 **2.4 Aerosol challenge induced specific antibody responses against *B. pertussis*** Anti-PT, PRN,  
247 FHA antibody titers were measured after challenge with *B. pertussis*. The seroconversion rate of  
248 antibody against PT reached 100% at day 14, and the seroconversion rate of antibody against FHA  
249 reached 100% at day 7 in both groups, the seroconversion rate of antibody against PRN reached  
250 100% at day 7 and day 10 for group 1 and group 2, respectively. In group 1, the antibody level  
251 against PT, and FHA peaked after day 31 with GMTs of 4.41, 4.81, respectively, the antibody level  
252 against PRN peaked after day 14 with GMTs of 4.35, and declined afterward (Fig. 6A). In group 2,  
253 the antibodies induced by pertussis were significantly elevated, and the GMTs of the antibodies  
254 against PT, FHA, and PRN, were 4.81, 4.96, and 5.31, respectively. The titers tended to of decline,

255 as in group 1 (Fig. 6B).

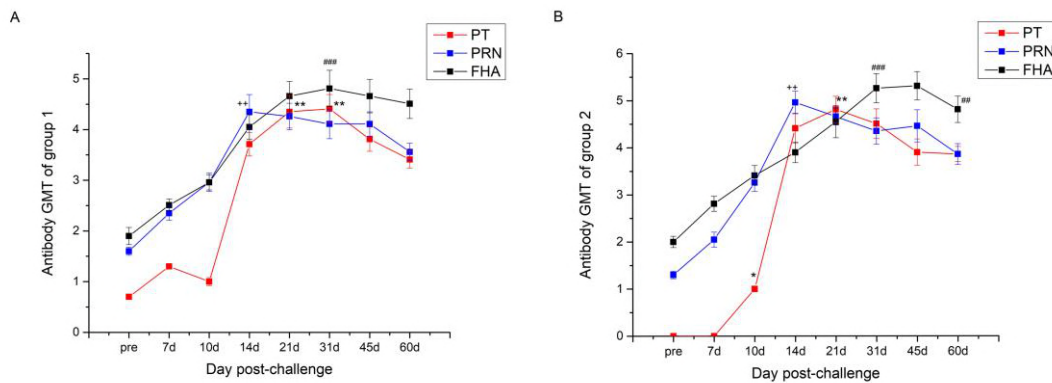

256

257 **Fig. 6 Dynamic profiles of the anti-PT, RPN, FHA antibody titers after challenged by *B.***  
 258 ***Pertussis*** ELISA method was adopted to determine antibody titers. (A) GMT of anti-PT, RPN,  
 259 FHA antibody in serum of group challenged for 30 min, \* $p < 0.05$ , \*\* $p < 0.01$ , +++ $p < 0.01$ , #### $p$   
 260  $< 0.001$ . (B) GMT of anti-PT, RPN, FHA antibody in serum of group challenged for 60 min, \* $p <$   
 261  $0.05$ , \*\* $p < 0.01$ , +++ $p < 0.01$ , #### $p < 0.001$ .

262

263 **2.5 Aerosol challenge with *B. pertussis* induced dynamic cytokine responses** The level of  
 264 sixteen cytokines—GM-CSF, G-CSF, IFN- $\gamma$ , IL-2, IL-10, IL-15, IL-17A, IL-13, IL-1 $\beta$ , IL-4, IL-5,  
 265 IL-6, TNF $\alpha$ , IL-12 (p40), IL-18, and IL-8—was measured at each time point after challenge. The  
 266 results indicated that IL-10 and IL-6 in the serum at day 5 after challenge were significantly  
 267 increased in group 1 ( $P < 0.05$ ) (Fig. 7). In group 2, IL-8 increased significantly at day 5  
 268 post-challenge, IL-6 increased significantly at day 7 post-challenge ( $P < 0.05$ ), and IL-2, IL-17A,  
 269 IL-12 (p40), and IL-18 significantly increased at day 14 and decreased at day 21 post-challenge.  
 270 ( $P < 0.05$ ) (Fig. 8). IL-10 increased significantly from day 14 to day 21, and decreased at day 31.  
 271 IL-13 increased from day 10 and reached the highest at day 14, then decrease but still significant  
 272 hither than pre-post, finally decreased at day 31.

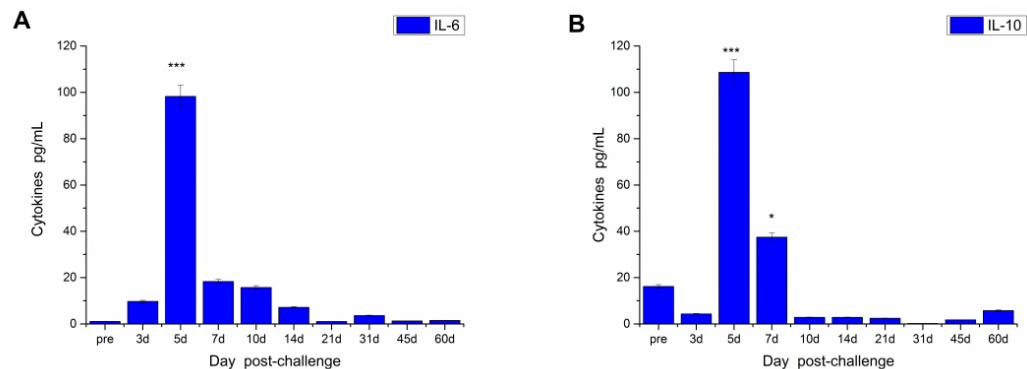

273

274 **Fig. 7 Dynamic profiles of cytokines after challenged 30min with *B. Pertussis*** Venous blood of  
 275 two groups was drawn at each time point after aerosol challenging and cytokines were determined  
 276 by liquid chip method. \* $p < 0.05$ , \*\*\* $p < 0.001$ .



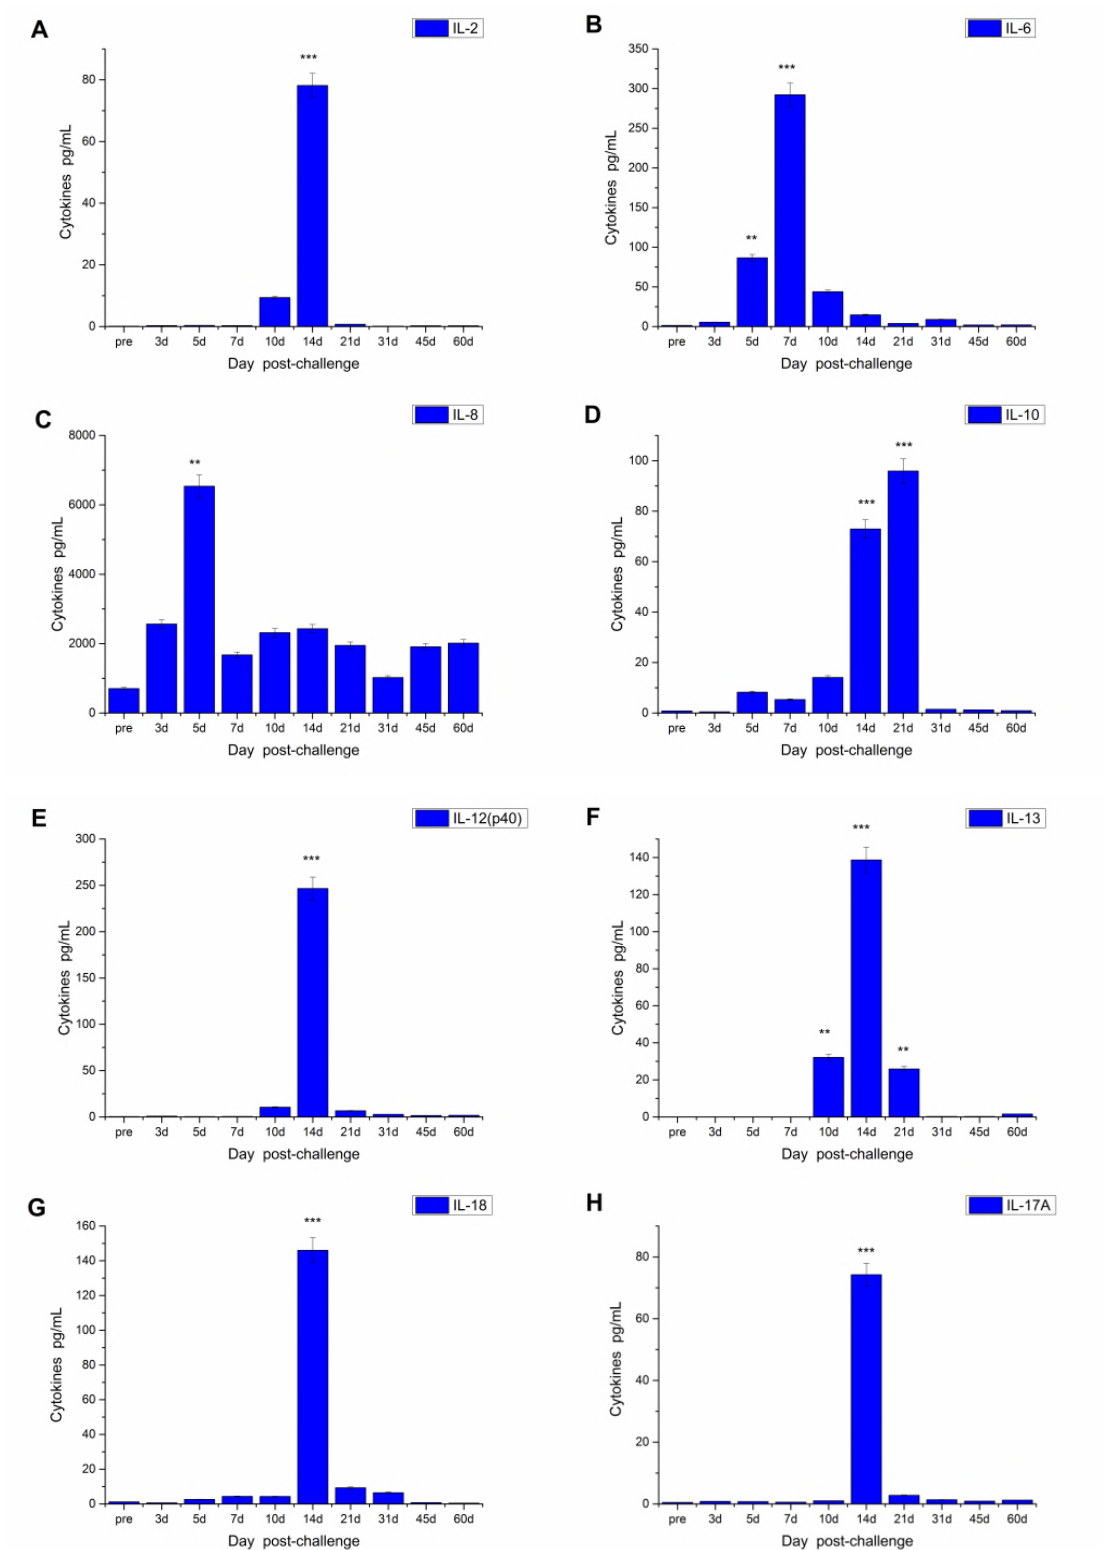

277

278

279 **Fig. 8 Dynamic profiles of cytokines after challenged 60min with *B. Pertussis*** Concentrations  
280 of cytokines in serum at different time point after challenge for 60 min were determined by liquid  
281 chip method using Luminex 200 which was described in Fig 7.

282

### 283 3 Discussion

284 Whole-cell pertussis vaccine (wP vaccine) was developed more than 80 years ago. This

285 vaccine significantly reduced the incidence of pertussis in children. However, because of strong  
286 adverse reactions, at present most developed countries use acellular pertussis (aP) vaccine. The aP  
287 vaccine is produced by different manufacturers and contains different types and amount of  
288 pertussis antigens, including pertussis toxin (PT), pertactin (PRN), filamentous haemagglutinin  
289 (FHA) and fimbriae (FIM). Moreover, the different immunization schedules for these vaccines  
290 increase the variability in vaccine immunogenicity. Some studies indicated that the resurgence of  
291 pertussis in recent years might be related to the lower efficacy of aP vaccines[29, 30]. Other  
292 studies suggested that the evolution of *B. pertussis* under the pressure of mass vaccination might  
293 induce immune adaptation[20]. Therefore, the establishment of suitable experimental challenge  
294 models, particularly nonhuman primate models, may provide a platform for studying pertussis  
295 pathogenesis, effectiveness of pertussis vaccine, and evaluate the different effectiveness of  
296 pertussis vaccine made from different antigen components.

297 Animal models of infection should reproduce the whole clinical spectrum of pertussis.  
298 Compared to other animal models, models with nonhuman primates are ideal because of their  
299 close evolutionary relationship with humans. Moreover, these models can help understand  
300 infection and the development of pathogenesis[31]. In the present study, rhesus monkeys were  
301 selected to investigate the whole clinical spectrum of pertussis after challenge, including  
302 inspiratory whoop, posttussive emesis, leukocytosis, and decreasing pulmonary capacity. One of  
303 the most important factors to consider when studying the above systems is the method of  
304 challenge. To date, nasal challenge, endotracheal intubation, in vivo injection, and aerosol  
305 challenge have been investigated in mice models of pertussis[32, 33]. Compared to other  
306 challenge methods, aerosol challenge can accurately simulate natural infections and decrease  
307 animal stress[34]. In our study, rhesus macaques were infected with *B. pertussis* via aerosol  
308 challenge and developed overt signs of clinical pertussis. First, after challenge with  $10^5$  CFU/mL  
309 *B. pertussis*, dynamic changes in leukocytosis were analyzed. The number of WBCs was  
310 significantly increased at day 3, peaked at day 7, and decreased gradually after that, and returned  
311 to baseline levels at day 45. The post-challenge concentration of WBCs was 6-fold higher than the  
312 baseline level. Second, the number of colonies in nasopharyngeal swabs peaked at day 14 after  
313 challenge, reached  $10^{6.73-6.91}$  per mL and returned to baseline levels after 31 days. Bacterial  
314 sequencing indicated that colonies were present only in nasopharyngeal samples but not in nasal  
315 samples. Third, the rectal temperature of rhesus macaques was increased at days 3 to 7 after  
316 challenge, and coughing was observed. However, lacking of suitable video recording system, the  
317 coughing frequency and duration were not recorded in present study. In the following research,  
318 these should be investigated in detail to provide the further information.

319 Another critical factor to consider when establishing an animal model is the age of the animals.  
320 A previous study using an enterovirus type 71 (EV71) rhesus monkey model suggested that, of the  
321 challenged animals, a clinical spectrum similar to that of humans was observed only in young  
322 animals[35]. Previous studies that challenged rhesus monkeys with pertussis investigated the  
323 fold-change in WBC counts and cough but did not evaluate clinical signs at adults animal[26, 28].  
324 Huang et al [36]has changed Taiwan monkey (*Macaca cyclopsis*) using 18-323 of *H. pertussis* and  
325 have investigated that the whooping cough, dynamic changes in leukocytosis and antibody  
326 response but not fever at young monkey. However it just mentioned the weighing of monkeys was  
327 from 550 to 1875 gm, but not the age information be recorded. A study that used baboons as a  
328 successful non-human primate pertussis model reported that young baboons showed severe

329 disease signs whereas adult baboons showed mild signs[31]. In the present study, rhesus monkeys  
330 aged 12 to 14 months were selected. In our study, the body temperature of rhesus macaques after  
331 challenge was increased 1~1.5 °C, which is similar to the increase observed in baboons infected  
332 with *B. pertussis* by the endotracheal route[24]. In the baboon model, the peak WBC count was  
333 5~10-fold higher than baseline counts in nine baboons. In our study, the peak WBC count was  
334 4.5~8.4-fold higher than the baseline count. *B. pertussis* was found in nasopharyngeal samples of  
335 rhesus macaque. In addition, the bacterial count reached  $8.1 \times 10^6$ /mL and was gradually  
336 decreased, which is similar to the results obtained using the baboon model. Therefore, we deduced  
337 that the change route as well as the age of the animals may influence the infection of *B. pertussis*.

338 Except for clinical symptoms, humoral and cellular immune responses are essential to  
339 evaluate pertussis infection. Previous studies that investigated immune mechanisms suggested that  
340 human pertussis-specific immune response protects against disease rather than against  
341 infection[37, 38]. In the present study, anti-PT, PRN, FHA antibody titers were gradually  
342 increased 10 days after challenge, anti-PT antibody titers peaked at days 21 to 31, anti-PRN  
343 antibody titers peaked at day 14, and anti-FHA antibody titers peaked at days 31 to 45 and then  
344 decreased. The specific T cell response to *B. pertussis* associated with different cytokines also  
345 plays an important role in the disease. The analysis of T cell responses in children demonstrated  
346 that Th1-type responses were predominant in natural infections and wP vaccine injection, whereas  
347 Th2-type responses were predominant after aP vaccine injection[39, 40]. Th17 was also involved  
348 in protective immunity against *B. pertussis*. Antigen-specific IL-17 was detected in the lungs 7  
349 days post challenge and reached a peak 3 to 4 weeks post challenge[41]. In present study, we  
350 measured changes in cellular activity in the serum of the study animals after challenge and found  
351 that IL-10 and IL-6 were significantly increased at day 5 in group 1 whereas IL-10, IL-2, IL-17A,  
352 IL-13, IL-12 (p40), IL-18, and IL-8 were increased at day 14 in group 2. This result demonstrated  
353 that Th1 and Th2 response was induced by aerosolised *B. pertussis*, particularly in group 2. Th17  
354 responses, which are critical for elimination of pertussis, were also detected.

355 The WBC count, number of colonies in nasopharyngeal samples, and anti-PT, PRN, and FHA  
356 antibody titers were significantly higher in group 2 compared to group 1. The levels of IL-10 and  
357 IL-6 in group 1 were significantly increased after challenge whereas more cytokines were  
358 increased in group 2, indicating that group 2 produced stronger cellular and humoral immune  
359 responses and presented more obvious symptoms compared to group 1. These observations could  
360 be relevant to high infection doses. The Th1, Th2, and Th17 responses observed in group 2 were  
361 similar to those found in the baboon model. Our results demonstrated that aerosol-challenged  
362 rhesus macaques aged 12 months could serve as an animal model of pertussis, and a bacterial  
363 concentration of  $10^5$  CFU/mL for 60 min was a suitable challenge intervention.

364 The type of challenge bacteria is another critical factor of study of animal model for pertussis.  
365 The baboon animal model conducted by Warfel et al [24] used *B. pertussis* strain D420, a recent  
366 clinical isolate from human infant with severe respiratory distress. In present study,  
367 CMCC58030(18323), which identified by Pearl Kendrick in the 1940s[42] was used. This strain  
368 also been used to challenge Taiwan Monkey in Huang *et al*'s study and showed the experimental  
369 whooping cough signs. The recent analysis on global population structure of *B. pertussis* has  
370 suggested that the prevalence of *B. pertussis* has changed in the last 100 years worldwide, in  
371 which strain 18323 belongs to the branch contains of a small number of strains showing a long  
372 distance from the major prevalent branch[43]. However strain 18323 is still used for determination

373 of potency for vaccines in China[44]. Surely, the prevalent stain isolated recently could provide a  
374 more powerful information, and it should be used to monitor pathogenicity difference of animal  
375 response in the future study.

376 In summary, the characteristic of pertussis infection in infant rhesus macaque was similar as in  
377 human beings, which provide a clue to using infant rhesus macaque as a candidate model of  
378 pertussis infection in the future studies for analyzing pertussis infection mechanisms and pertussis  
379 vaccines.

380

381

382 **Conflict of interest:** The authors declare that there are no conflicts of interest associated with this  
383 study.

384

### 385 **Acknowledgments**

386 We are grateful to the research staff at the Department of Nonhuman Primate Research Center of  
387 the Institute of Medical Biology, Chinese Academy of Medical Sciences & Peking Union Medical  
388 College for their contribution to this research, and to the Department of Diphtheria, Tetanus, and  
389 Pertussis vaccine and Toxins of the National Institutes for Food and Drug Control for assisting in  
390 antibody detection.

391

### 392 **Funding**

393 This study was funded by the National Health and Family Planning Commission of China  
394 (2015ZX09101031), Yunnan Provincial Science and Technology Department (2016GA004 and  
395 2016ZF003), and CAMS Initiative for Innovative Medicine (2016-I2M-1-019). These funding  
396 agencies were not involved in the study design, data collection and analysis, decision to publish,  
397 and preparation of the manuscript.

398

### 399 **Author Contributions**

400 Conceived and designed the experiments: Mingbo Sun, Li Shi. Performed and experiments:  
401 Dachao Mou, Peng Luo, Jiangli Liang, Qiuyan Ji, Lichan Wang, Na Gao, Qin Gu, Chen Wei, Yan  
402 Ma. Data Analysis: Peng Luo, Dachao Mou, Jingyan Li and Shuyuan Liu. Manuscript writing:  
403 Mingbo Sun, Li Shi, Jingyan Li and Dachao Mou.

404

405

### 406 **References**

- 407 1. Pramono RX, Imtiaz SA, Rodriguez-Villegas E. A Cough-Based Algorithm for Automatic Diagnosis  
408 of Pertussis. *Plos One*. 2016;11(9):e0162128.
- 409 2. Holmes WH. Bacillary and rickettsial infections : acute and chronic a text-book : black death to  
410 white plague: The Macmillan company; 1941.
- 411 3. Muller F. Laboratory diagnosis of pertussis : state of art in 1997. *Journal of Clinical Microbiology*.  
412 1997;35.
- 413 4. Hallander HO. Microbiological and serological diagnosis of pertussis. *Clinical Infectious Diseases*.  
414 1999;28 Suppl 2(Supplement\_2):S99-106.

- 415 5. Aquinoandrade A, Martínezleyva G, Méridavieyra J, Saltigeral P, Lara A, Domínguez W, et al.  
416 Real-Time Polymerase Chain Reaction-Based Detection of *Bordetella pertussis* in Mexican Infants and  
417 Their Contacts: A 3-Year Multicenter Study. *J Pediatr*. 2017;188:217.
- 418 6. Hedenskog S, Björkstén B, Blennow M, Granström G, Granström M. Immunoglobulin E response  
419 to pertussis toxin in whooping cough and after immunization with a whole-cell and an acellular  
420 pertussis vaccine. *International Archives of Allergy & Immunology*. 1989;89(2-3):156-61.
- 421 7. Ganeshalingham A, Wilde J, Anderson BJ. The Neutrophil-to-Lymphocyte Ratio in *Bordetella*  
422 *Pertussis* Infection. *Pediatric Infectious Disease Journal*. 2017.
- 423 8. Kht Y, Duclos P, Eas N, Rcw H. An update of the global burden of pertussis in children younger  
424 than 5 years: a modelling study. *Lancet Infectious Diseases*. 2017;17(9):974.
- 425 9. Dias WO, Aa VDA, Sakauchi MA, Kubrusly FS, Prestes AF, Borges MM, et al. An improved whole  
426 cell pertussis vaccine with reduced content of endotoxin. *Human Vaccines*. 2013;9(2):339-48.
- 427 10. Sato H, Sato Y. Relationship between structure and biological and protective activities of pertussis  
428 toxin. *Dev Biol Stand*. 1991;73(73):121-32.
- 429 11. Sato Y, Sato H. Development of Acellular Pertussis Vaccines. *Biologicals Journal of the*  
430 *International Association of Biological Standardization*. 1999;27(2):61.
- 431 12. Cardona D, Garzón MO, Calle M, Agudelo MC, Segura Á. [Trends in pertussis mortality and  
432 morbidity in Colombia, 2002-2012]. *Biomedica Revista Del Instituto Nacional De Salud*.  
433 2016;36(3):397.
- 434 13. Rohani P, Drake JM. The decline and resurgence of pertussis in the US. *Epidemics*.  
435 2011;3(3-4):183.
- 436 14. Gill C, Rohani P, Thea DM. The relationship between mucosal immunity, nasopharyngeal carriage,  
437 asymptomatic transmission and the resurgence of *Bordetella pertussis*. *F1000res*. 2017;6:1568.
- 438 15. Burdin N, Handy LK, Plotkin SA. What Is Wrong with Pertussis Vaccine Immunity? The Problem of  
439 Waning Effectiveness of Pertussis Vaccines. *Cold Spring Harbor Perspectives in Biology*.  
440 2017;9(12):a029454.
- 441 16. Locht C. Live pertussis vaccines: will they protect against carriage and spread of pertussis?  
442 *Clinical Microbiology & Infection*. 2016;22:S96-S102.
- 443 17. Srivastav A, Black CL, Lu PJ, Zhang J, Liang JL, Greby SM. Tdap Vaccination Among Healthcare  
444 Personnel, Internet Panel Survey, 2012-2014. *American Journal of Preventive Medicine*. 2017.
- 445 18. Barbosa F, Barnett ED, Gautret P, Schlagenhauf P, van Genderen PJ, Grobusch MP, et al. *Bordetella*  
446 *pertussis* infections in travelers: data from the GeoSentinel global network. *Journal of Travel Medicine*.  
447 2017;24(3).
- 448 19. van Amersfoort SC, Schouls LM, van der Heide HG, Advani A, Hallander HO, Bondeson K, et al.  
449 Analysis of *Bordetella pertussis* populations in European countries with different vaccination policies. *J*  
450 *Clin Microbiol*. 2005;43(6):2837-43. Epub 2005/06/16. doi: 10.1128/JCM.43.6.2837-2843.2005. PubMed  
451 PMID: 15956406; PubMed Central PMCID: PMC151907.
- 452 20. Aa VDA, Hozbor DF, Boog CJ, Metz B, Gp VDD, van Els CA. Resurgence of pertussis calls for  
453 re-evaluation of pertussis animal models. *Expert Review of Vaccines*. 2012;11(9):1121-37.
- 454 21. Elahi S, Holmstrom J, Gerds V. The benefits of using diverse animal models for studying pertussis.  
455 *Trends in Microbiology*. 2007;15(10):462-8.
- 456 22. Vandebriel RJ, Hellwig SMM, Vermeulen JP, Hoekman JHG, Dormans JAMA, Roholl PJM, et al.  
457 Association of *Bordetella pertussis* with host immune cells in the mouse lung. *Microbial Pathogenesis*.  
458 2003;35(1):19-29.

- 459 23. Safarchi A, Octavia S, Luu LD, Tay CY, Sintchenko V, Wood N, et al. Better colonisation of newly  
460 emerged *Bordetella pertussis* in the co-infection mouse model study. *Vaccine*. 2016;34(34):3967-71.
- 461 24. Warfel JM, Beren J, Kelly VK, Lee G, Merkel TJ. Nonhuman Primate Model of Pertussis. *Infection &*  
462 *Immunity*. 2012;80(4):1530-6.
- 463 25. Vinson A, Prongay K, Ferguson B. The value of extended pedigrees for next-generation analysis of  
464 complex disease in the rhesus macaque. *Ilar Journal*. 2013;54(2):91-105.
- 465 26. North EA, Keogh EV, Christie R, Anderson G. Experimental Pertussis in the Monkey (*Macaca*  
466 *mulatta*). *Australian Journal of Experimental Biology & Medical Science*. 1940;18:125-9.
- 467 27. Rich AR, Long PH, Brown JH, Bliss EA, Jr HL. EXPERIMENTS UPON THE CAUSE OF WHOOPING  
468 COUGH. *Science*. 1932;76(1971):330.
- 469 28. Sauer LW, Hambrecht L. EXPERIMENTAL WHOOPING COUGH. *American Journal of Diseases of*  
470 *Children*. 1929;37(4):732-44.
- 471 29. Melvin JA, Scheller EV, Miller JF, Cotter PA. *Bordetella pertussis* pathogenesis: current and future  
472 challenges. *Nature Reviews Microbiology*. 2014;12(4):274.
- 473 30. Vermeulen F, Verscheure V, Damis E, Vermeylen D, Leloux G, Dirix V, et al. Cellular Immune  
474 Responses of Preterm Infants after Vaccination with Whole-Cell or Acellular Pertussis Vaccines. *Clinical*  
475 *& Vaccine Immunology*. 2010;17(2):258-62.
- 476 31. Merkel TJ, Halperin SA. Nonhuman primate and human challenge models of pertussis. *Journal of*  
477 *Infectious Diseases*. 2014;209 Suppl 1(suppl 1):S20-3.
- 478 32. Kwon HJ, Han SB, Kim BR, Kang KR, Huh DH, Choi GS, et al. Assessment of safety and efficacy  
479 against *Bordetella pertussis* of a new tetanus-reduced dose diphtheria-acellular pertussis vaccine in a  
480 murine model. *Bmc Infectious Diseases*. 2017;17(1):247.
- 481 33. Wilk MM, Misiak A, Mcmanus RM, Allen AC, Lynch MA, Khg M. Lung CD4 Tissue-Resident  
482 Memory T Cells Mediate Adaptive Immunity Induced by Previous Infection of Mice with *Bordetella*  
483 *pertussis*. *Journal of Immunology*. 2017.
- 484 34. Izumiya K. Aerosol Infection of Mice with *Bordetella pertussis*. *Infection & Immunity*.  
485 1980;29(1):261-6.
- 486 35. Zhao T, Zhang Z, Zhang Y, Feng M, Fan S, Wang L, et al. Dynamic Interaction of Enterovirus 71 and  
487 Dendritic Cells in Infected Neonatal Rhesus Macaques. *Frontiers in Cellular & Infection Microbiology*.  
488 2017;7.
- 489 36. Huang CC, Chen PM, Kuo JK, Wen HC, Lin ST, Lin HS, et al. Experimental whooping cough. *N Engl J*  
490 *Med*. *New England Journal of Medicine*. 1962;266(3):105-11.
- 491 37. Storsaeter J, Hallander HO, Gustafsson L, Olin P. Levels of anti-pertussis antibodies related to  
492 protection after household exposure to *Bordetella pertussis*. *Vaccine*. 1998;16(20):1907-16.
- 493 38. Cherry JD, Gornbein J, Heininger U, Stehr K. A search for serologic correlates of immunity to  
494 *Bordetella pertussis* cough illnesses. *Vaccine*. 1998;16(20):1901-6.
- 495 39. Mascart F, Verscheure V, Malfroot A, Hainaut M, Piérard D, Temerman S, et al. *Bordetella*  
496 *pertussis* infection in 2-month-old infants promotes type 1 T cell responses. *Journal of Immunology*.  
497 2003;170(3):1504-9.
- 498 40. Ryan M, Murphy G, Ryan E, Nilsson L, Shackley F, Gothefors L, et al. Distinct T-cell subtypes  
499 induced with whole cell and acellular pertussis vaccines in children. *Immunology*. 1998;93(1):1-10.
- 500 41. Ross PJ, Sutton CE, Higgins S, Allen AC, Walsh K, Misiak A, et al. Relative contribution of Th1 and  
501 Th17 cells in adaptive immunity to *Bordetella pertussis*: towards the rational design of an improved  
502 acellular pertussis vaccine. *PLoS pathogens*. 2013;9(4):e1003264.



- 503 42. Thomas E. Keuchhusten: Springer Berlin Heidelberg; 1942. 390-8 p.  
504 43. Bart MJ, Harris SR, Advani A, Arakawa Y, Bottero D, Bouchez V, et al. Global population structure  
505 and evolution of Bordetella pertussis and their relationship with vaccination. Mbio. 2014;5(2):e01074.  
506 44. China TSPCoPR. PHARMACOPOEIA OF THE PEOPLE'S REPUBLIC OF CHINA. 2015 Volume  
507 III:136-7.  
508
